# Supplementary material for: Perceived Health and Nutrition Concerns as Predictors of Dietary Patterns among Polish Females Aged 13–21 Years (GEBaHealth Project)
Source: MDPI journal article supplement (doi:10.3390/nu9060613), 2017-06-16
Supplement: s1 [file s1]

## Supplementary Materials

**Table S1.** Sample distribution by categories of perceived health and nutrition concerns

| Category                           | Health Concern Index |                 |                       | Nutrition Concern Index |                 |                       |
|------------------------------------|----------------------|-----------------|-----------------------|-------------------------|-----------------|-----------------------|
|                                    | Range (points)       | Sample size (n) | Sample percentage (%) | Range (points)          | Sample size (n) | Sample percentage (%) |
| total sample                       | 0–18                 | 1107            | 100.0                 | 0–42                    | 1107            | 100.0                 |
| tertile distribution               |                      |                 |                       |                         |                 |                       |
| bottom tertile                     | 0–4                  | 355             | 32.1                  | 0–12                    | 339             | 30.6                  |
| middle tertile                     | 5–8                  | 424             | 38.3                  | 13–19                   | 417             | 37.6                  |
| upper tertile                      | 9–18                 | 328             | 29.6                  | 20–42                   | 351             | 31.8                  |
| a priori distribution <sup>a</sup> |                      |                 |                       |                         |                 |                       |
| low concerns                       | 0–5                  | 420             | 37.9                  | 0–13                    | 386             | 34.9                  |
| neutral concerns                   | 6–12                 | 587             | 53.1                  | 14–28                   | 645             | 58.3                  |
| high concerns                      | 13–18                | 100             | 9.0                   | 29–42                   | 76              | 6.8                   |

All data adjusted for sample weights. <sup>a</sup> cut-offs were calculated as 1/3 and 2/3 of minimum-maximum range. Health Concern Index and Nutrition Concern Index were calculated as a sum of points assigned to each statements based on 7-point Likert scale starting from 'definitely not' (0 point) through 'neither not nor yes' (3 points) to 'definitely yes' (6 points).

**Table S2.** Components of dietary patterns identified by principal component analysis (factor loadings).

| Foods                                             |                                                       | Factor 1:<br>'Traditional<br>Polish' | Factor 2:<br>'Fruit &<br>vegetables' | Factor 3:<br>'Fast food &<br>sweets' | Factor 4:<br>'Dairy &<br>fats' |
|---------------------------------------------------|-------------------------------------------------------|--------------------------------------|--------------------------------------|--------------------------------------|--------------------------------|
| Food frequency consumption of <sup>a</sup> :      | White bread (including biscuits, muffins)             | 0.65                                 |                                      |                                      |                                |
|                                                   | Potatoes                                              | 0.52                                 |                                      |                                      |                                |
|                                                   | Red meats                                             | 0.51                                 |                                      |                                      |                                |
|                                                   | Margarine or butter                                   | 0.45                                 |                                      |                                      | 0.45                           |
|                                                   | Fried chicken                                         | 0.42                                 |                                      |                                      |                                |
|                                                   | Wholegrain bread                                      | -0.48                                |                                      |                                      |                                |
|                                                   | Green salad                                           |                                      | 0.57                                 |                                      |                                |
|                                                   | Fruit (without juices)                                |                                      | 0.55                                 |                                      |                                |
|                                                   | Prepared vegetables                                   |                                      | 0.55                                 |                                      |                                |
|                                                   | Beans                                                 |                                      | 0.45                                 |                                      |                                |
|                                                   | French fries or potato chips or corn chips or popcorn |                                      |                                      | 0.71                                 |                                |
|                                                   | Hamburgers or cheeseburgers                           |                                      |                                      | 0.60                                 |                                |
|                                                   | Ice cream                                             |                                      |                                      | 0.52                                 |                                |
|                                                   | Doughnuts or pastries or cake or cookies              |                                      |                                      | 0.50                                 |                                |
|                                                   | Salad dressings or mayonnaise (not diet)              |                                      |                                      | 0.42                                 |                                |
|                                                   | Cheese or cheese spread                               |                                      |                                      |                                      | 0.54                           |
|                                                   | Whole milk                                            |                                      |                                      |                                      | 0.49                           |
| Food intake variety by food groups <sup>b</sup> : | Meats, fish and eggs                                  | 0.60                                 |                                      |                                      |                                |
|                                                   | Fats                                                  | 0.45                                 |                                      |                                      | 0.43                           |
|                                                   | Vegetables                                            |                                      | 0.60                                 |                                      |                                |
|                                                   | Fruit                                                 |                                      | 0.54                                 |                                      |                                |
|                                                   | Sweets and snacks                                     |                                      |                                      | 0.47                                 |                                |
|                                                   | Cereals and potatoes                                  |                                      |                                      |                                      | 0.56                           |
| Dairy products                                    |                                                       |                                      |                                      |                                      | 0.54                           |
| Eigenvalues                                       |                                                       | 4.36                                 | 2.39                                 | 1.68                                 | 1.44                           |
| Variance explained (%) <sup>c</sup>               |                                                       | 14.5                                 | 9.0                                  | 5.6                                  | 4.8                            |

Factor loadings of  $\leq |0.40|$  are not shown in the table for simplicity. Sorted by loadings from 1st to 4th factor. All data adjusted for sample weights. <sup>a</sup> Food frequency consumption was expressed in points (range 0–4 points). <sup>b</sup> Food intake variety was expressed in foods consumed per week (with

ranges from 0–4 to 0–14 foods/week). <sup>c</sup> Total variance in dietary variables explained by 4 patterns is 33.9%

**Table S3.** Perceived health and nutrition concerns by socioeconomic status, body weight status and dietary patterns (mean (SD), in points).

| Variable                  |                | Number | Health Concern Index <sup>c</sup> | <i>p</i> -value | Nutrition Concern Index <sup>d</sup> | <i>p</i> -value |
|---------------------------|----------------|--------|-----------------------------------|-----------------|--------------------------------------|-----------------|
| Total sample              |                | 1107   | 6.9 (3.7)                         |                 | 17.1 (6.6)                           |                 |
| Age                       | 13-15 y        | 326    | 6.5 (3.4)                         | 0.0911          | 16.8 (6.1)                           | 0.6516          |
|                           | 16-18 y        | 367    | 7.2 (3.8)                         |                 | 17.2 (7.1)                           |                 |
|                           | 19-21 y        | 414    | 7.1 (3.8)                         |                 | 17.3 (6.6)                           |                 |
| Residence                 | Rural area     | 521    | 7.1 (3.6)                         | 0.0770          | 17.2 (6.9)                           | 0.9975          |
|                           | Town           | 348    | 6.6 (3.7)                         |                 | 17.1 (6.7)                           |                 |
|                           | City           | 238    | 7.1 (3.8)                         |                 | 16.9 (5.9)                           |                 |
| SES Index <sup>a</sup>    | Low            | 401    | 6.9 (3.8)                         | 0.9042          | 17.1 (6.7)                           | 0.9314          |
|                           | Medium         | 339    | 7.0 (4.0)                         |                 | 17.2 (7.0)                           |                 |
|                           | High           | 367    | 6.8 (3.3)                         |                 | 17.0 (6.2)                           |                 |
| BMI category <sup>b</sup> | Underweight    | 110    | 4.6 (2.5)                         | <0.0001         | 13.8 (4.8)                           | 0.0599          |
|                           | Normal weight  | 849    | 6.8 (3.5)                         |                 | 16.9 (6.5)                           |                 |
|                           | Overweight     | 115    | 9.4 (3.9)                         |                 | 21.3 (7.2)                           |                 |
|                           | Obese          | 18     | 9.7 (4.6)                         |                 | 20.2 (6.9)                           |                 |
| Dietary patterns          |                |        |                                   |                 |                                      |                 |
| ‘Traditional Polish’      | Bottom tertile | 367    | 7.6 (3.8)                         | <0.0001         | 17.4 (6.8)                           | 0.0599          |
|                           | Middle tertile | 364    | 6.8 (3.5)                         |                 | 17.4 (6.5)                           |                 |
|                           | Upper tertile  | 376    | 6.4 (3.7)                         |                 | 16.6 (6.6)                           |                 |
| ‘Fruit and vegetables’    | Bottom tertile | 364    | 6.7 (3.4)                         | 0.5826          | 16.5 (6.4)                           | 0.0550          |
|                           | Middle tertile | 367    | 6.9 (3.5)                         |                 | 17.0 (6.9)                           |                 |
|                           | Upper tertile  | 376    | 7.2 (4.1)                         |                 | 17.7 (6.6)                           |                 |
| ‘Fast foods and sweets’   | Bottom tertile | 365    | 7.4 (3.8)                         | 0.0009          | 17.3 (6.4)                           | 0.1821          |
|                           | Middle tertile | 365    | 6.9 (3.6)                         |                 | 17.2 (6.7)                           |                 |
|                           | Upper tertile  | 377    | 6.5 (3.6)                         |                 | 16.8 (6.8)                           |                 |
| ‘Dairy and fats’          | Bottom tertile | 366    | 7.4 (3.7)                         | 0.0005          | 17.4 (6.7)                           | 0.5634          |
|                           | Middle tertile | 365    | 6.8 (3.6)                         |                 | 16.9 (6.6)                           |                 |
|                           | Upper tertile  | 376    | 6.6 (3.7)                         |                 | 17.0 (6.6)                           |                 |

SD—standard deviation. Sample size may vary in each variable due to missing data. All data adjusted for sample weights. <sup>a</sup> SES index: calculated from four single variables (mother’s education, father’s education, economic status, description of household); SES index categories based on tertile distribution. <sup>b</sup> BMI: body mass index (n = 1092); weight status categories assigned according to IOTF standards [27]; for girls 13–18 years old according to age-sex-specific BMI cut-offs; for girls > 18 years old according to cut-offs for girls at age 18. <sup>c</sup> Index range: 0–18 points. <sup>d</sup> Index range: 0–42 points, both indices were calculated as a sum of points assigned to each statement based on 7-point Likert scale starting from ‘definitely not’ (0 point) through ‘neither not nor yes’ (3 points) to ‘definitely yes’ (6 points). *p*-value: significance level of Kruskal–Wallis test.
